# Supplementary material
Source: publisher site journal article supplement (https://natureconservation.pensoft.net/article/85179/download/suppl/31/)
Supplement: Supplementary file 1

## **Notes on the data**

The raw datas (tif format) used for each year are stored in three folders named after the year, and the corresponding name for the landscape classification data is landuse + year (landuse2000.tif, landuse2010.tif, landuse2020.tif. Other datas are also named in the same way); the name of the nighttime light data is ntl + year; population density datas are named pop + year; different landscape pattern indices datas are named ed/contag/shdi/pd + year; habitat quality index datas are named hq + year.

Data for rural settlements (named rural\_settlements), datas for GeoGA bivariate spatial autocorrelation analysis (named grid+year), and data for Geodetector sampling analysis (named geodetector\_sampling\_points) are in shp format.

The geodetector sampling results are in dBASE format, named Sampling\_result\_table+year, and are stored in the geodetector results folder.

The name of the geographic elevation data in the study area is dem.tif.

All datas can be opened in ArcGIS.

All the above datas can be downloaded through this link below.

<https://pan.baidu.com/s/1toHBpIlwkDFINxr2RITEXg>

Link Password: 12k6
